# Supplementary material for: The brains of six African mole-rat species show divergent responses to hypoxia
Source: Oxford University Press journal article supplement (doi:10.1242/jeb.215905), 2020-01-01
Supplement: jeb215905supp.pdf [file jeb215905supp.pdf]

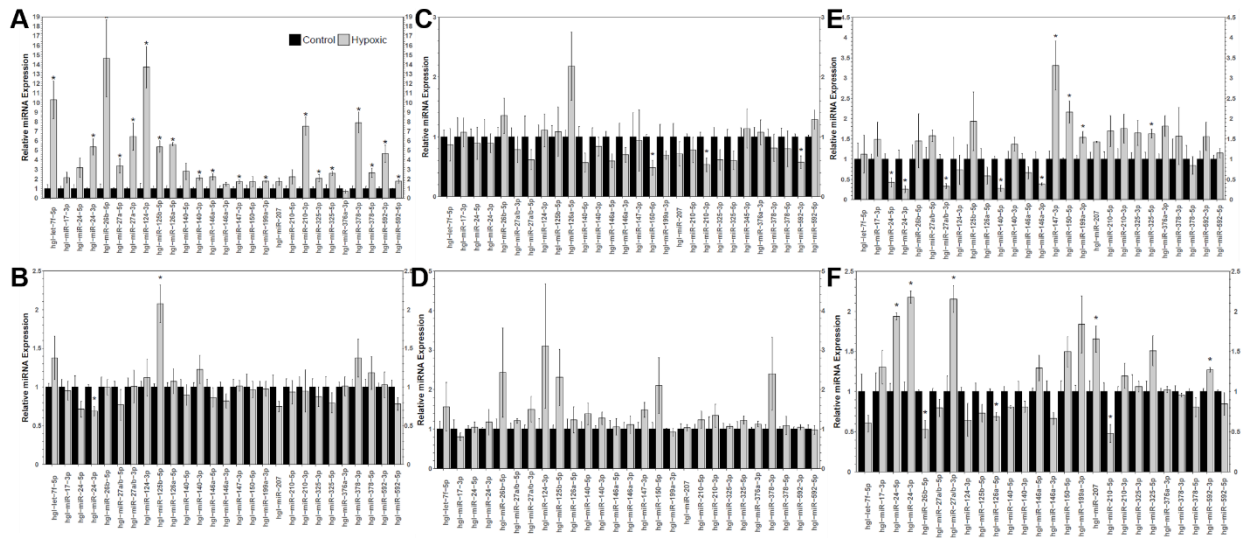

**Figure S1:** Relative miRNA expression levels in (A) *Bathyergus suillus*, (B) *Cryptomys hottentotus hottentotus*, (C) *Cryptomys hottentotus mahali*, (D) *Cryptomys hottentotus pretoriae*, (E) *Georychus capensis*, and (F) *Heterocephalus glaber* brain tissue in response to hypoxia. Data are mean  $\pm$  SEM,  $n = 4$  RNA isolations from different individuals for each species. Asterisks indicate data that are significantly different from the control condition ( $p < 0.05$ ).



**Table S1:** MiRNA sequences and forward primers designed from *Heterocephalus glaber* (hgl).

| miRNA                  | Mature sequence (5' - 3') | Primer (5' - 3')              |
|------------------------|---------------------------|-------------------------------|
| <b>hgl-let-7f-5p</b>   | UGAGGUAGUAGAUUGUAUAGUU    | ACACTCCAGCTGGGTGAGGTAGTAGATTG |
| <b>hgl-miR-17-3p</b>   | ACUGCAGUGAGGGGCACUUGUAG   | ACACTCCAGCTGGGCTGCAGTGAGGGCAC |
| <b>hgl-miR-24-5p</b>   | UGCCUACUGAGCUGAUAUACAGU   | ACACTCCAGCTGGGTGCCTACTGAGCTGA |
| <b>hgl-miR-24-3p</b>   | GGCUCAGUUCAGCAGGAACAG     | ACACTCCAGCTGGGGGCTCAGTTCAGCAG |
| <b>hgl-miR-26b-5p</b>  | UUCAAGUAAUUCAGGAUAGGU     | ACACTCCAGCTGGGTTCAAGTAATTCAGG |
| <b>hgl-miR-27a-5p</b>  | AGGGCUUAGCUGCUUGUGAGCA    | ACACTCCAGCTGGGAGGGCTTAGCTGCTT |
| <b>hgl-miR-27a-3p</b>  | UUCACAGUGGCUAAGUUCGCG     | ACACTCCAGCTGGGTTACAGTGGCTAAG  |
| <b>hgl-miR-124-3p</b>  | UAAGGCACGCGGUGAAUGCC      | ACACTCCAGCTGGGTAAGGCACGCGGTGA |
| <b>hgl-miR-125b-5p</b> | UCCUGAGACCCUAACUUGUGA     | ACACTCCAGCTGGGTCCCTGAGACCCTAA |
| <b>hgl-miR-126a-5p</b> | CAUUAUUACUUUUGGUACGCG     | ACACTCCAGCTGGGCATTATTACTTTTGG |
| <b>hgl-miR-140-5p</b>  | CAGUGGUUUUACCCUAUGGUAG    | ACACTCCAGCTGGGTGGTTTTACCCTATG |
| <b>hgl-miR-140-3p</b>  | UACCACAGGGUAGAACCACGG     | ACACTCCAGCTGGGACCACAGGGAAGAAC |
| <b>hgl-miR-146a-5p</b> | UGAGAACUGAAUCCAUGGGUU     | ACACTCCAGCTGGGTGAGAAGTGAATTCC |
| <b>hgl-miR-146a-3p</b> | CCUGUGAAAUUCAGUUCUUCAG    | ACACTCCAGCTGGGCCTGTGAAATTCAGT |
| <b>hgl-miR-147-3p</b>  | GUGUGCGGAAUAGCUUCUGCUA    | ACACTCCAGCTGGGGTGTGCGGAAGTGCT |
| <b>hgl-miR-150-5p</b>  | UCUCCCAACCCUUGUACCAGUG    | ACACTCCAGCTGGGTCTCCCAACCCCTGT |
| <b>hgl-miR-199a-3p</b> | ACAGUAGUCUGCACAUUGGUUA    | ACACTCCAGCTGGGACAGTAGTCTGCACA |
| <b>hgl-miR-207</b>     | GCUUCUCCUGGCUUCCUCCUC     | ACACTCCAGCTGGGTCTCCTGTCTCTCCT |
| <b>hgl-miR-210-5p</b>  | AGCCACUGCCCACCGCACACUG    | ACACTCCAGCTGGGCCACTGCCACCGCA  |
| <b>hgl-miR-210-3p</b>  | CUGUGCGUGUGACAGCGGCUGA    | ACACTCCAGCTGGGCTGTGCGTGTGACAG |
| <b>hgl-miR-325-3p</b>  | UUUAUUGAGCACCUCUAUCAA     | ACACTCCAGCTGGGTTTATTGAGCACCTA |
| <b>hgl-miR-325-5p</b>  | CCUAGUAGGUGCUCAGUAAGUGU   | ACACTCCAGCTGGGTAGTAGGTGCTCAGT |
| <b>hgl-miR-376a-3p</b> | AUCGUAGAGGAAAUCCACGU      | ACACTCCAGCTGGGATCGTAGAGGAAAAT |
| <b>hgl-miR-378-3p</b>  | ACUGGACUUGGAGUCAGAAGG     | ACACTCCAGCTGGGACTGGACTTGGAGTC |
| <b>hgl-miR-378-5p</b>  | CUCCUGACUCCAGGUCCUGUGU    | ACACTCCAGCTGGGCTCCTGACTCCAGGT |
| <b>hgl-miR-592-3p</b>  | UCAUCACGUGGUGACGCAACAU    | ACACTCCAGCTGGGATCACGTGGTGACGC |
| <b>hgl-miR-592-5p</b>  | AUUGUGUCAAU AUGCGAUGAUGU  | ACACTCCAGCTGGGATTGTGTCAATATGC |

**Table S2:** List of top 5 contributing factors to PC1 and PC2 for each species using the data from control and hypoxic animals and then considering all species together using only the data from hypoxic groups. Variables that are not bolded were repeats of the variables used for PCA plots (bolded). For *C. h. pretoriae*, there were only three variables that appeared above the reference line of the barplots generated by the `fviz_contrib` function, indicating only three variables contribute to PC2 in this species.

| <i>Species</i>           | <i>Top 5 variables contributing to PC1</i>              | <i>Top 5 variables contributing to PC2</i>                 |
|--------------------------|---------------------------------------------------------|------------------------------------------------------------|
| <i>B. suillus</i>        | <b>26b-5p, 124-3p</b> let-7f-5p, 378-3p, 210-3p         | 210-3p, 26b-5p, <b>24-5p, 125b-5p,</b> 378-3p              |
| <i>C. h. hottentotus</i> | <b>HIF1 protein, 125b-5p, 378-3p,</b> 27a-5p, let-7f-5p | <b>AO capacity, 378-5p, 124-3p, 325-5p,</b> 378-3p         |
| <i>C. h. mahali</i>      | <b>HIF1 protein, 126a-5p, 147-3p,</b> 27a-3p, 207       | 147-3p, HIF1 protein, <b>17-3p, 125-5p,</b> 126a-5p        |
| <i>C. h. pretoriae</i>   | <b>124-3p, 26b-5p, 378-3p, 150-5p,</b> let-7f-5p        | <b>125b-5p, 26b-5p, 17-3p</b>                              |
| <i>G. capensis</i>       | <b>147-3p, 125b-5p, 378-3p, 26b-5p,</b> 210-3p          | <b>124-3p, 378-3p, 592-3p,</b> 147-3p, let-7f-5p           |
| <i>H. glaber</i>         | <b>24-3p, 27a-3p, 199a-3p, 24-5p, 150-5p</b>            | <b>17-3p,</b> 199a-3p, <b>HIF1 protein,</b> 27a-3p, let-7f |
| All species              | <b>26b-5p, 124-3p</b> let-7f-5p, 378-3p, 210-3p         | 210-3p, <b>24-5p,</b> 26b-5p, <b>125b-5p,</b> 378-3p       |

**Table S3:** General functions of miRNAs implicated in the response to hypoxia in the brains of several species of mole-rats.

| miRNA                    | Function                                                                                                    | Reference(s)                                                                                                        |
|--------------------------|-------------------------------------------------------------------------------------------------------------|---------------------------------------------------------------------------------------------------------------------|
| <b>Apoptosis</b>         |                                                                                                             |                                                                                                                     |
| miR-24                   | Inhibit apoptosis and HIF degradation                                                                       | (Roscigno et al., 2017; Sun et al., 2016)                                                                           |
| miR-27                   | Inhibit apoptosis                                                                                           | (Chen et al., 2014; Sabirzhanov et al., 2014)                                                                       |
| miR-26<br>(decrease)     | Anti-apoptosis, anti-autophagy                                                                              | (Nallamshetty et al., 2013)                                                                                         |
| miR-147                  | Inhibit apoptosis                                                                                           | (Han et al., 2017)                                                                                                  |
| miR-207                  | Anti-apoptosis, anti-autophagy                                                                              | (Tao et al., 2015)                                                                                                  |
| miR-210                  | Anti-apoptosis, pro-angiogenesis and tissue repair                                                          | (Meng et al., 2018; Zeng et al., 2011)                                                                              |
|                          | Inhibit HIF degradation                                                                                     | (Bavelloni et al., 2017)                                                                                            |
| miR-378                  | Inhibit apoptosis                                                                                           | (Fang et al., 2012)                                                                                                 |
| miR-592                  | Inhibit apoptosis<br>Cell proliferation,<br>Cellular metabolism                                             | (Irmady et al., 2014)<br>(He et al., 2018)<br>(Haque et al., 2016; Jia et al., 2016)                                |
|                          | Inhibits astroglial differentiation and cell maturation                                                     | (Zhang et al., 2013)                                                                                                |
| <b>Inflammation</b>      |                                                                                                             |                                                                                                                     |
| miR-124                  | Inhibit neuroinflammation<br>Suppresses autophagy                                                           | (Huang et al., 2018)<br>(Gu et al., 2016)                                                                           |
| miR-125b                 | Pro-inflammatory<br>Neuroprotective – promote neuronal lipid membranes<br>Promotes neuronal differentiation | (Mar-Aguilar et al., 2013; Rink and Khanna, 2011; Zhang et al., 2017)<br>(Zhang et al., 2019)<br>(Xiu et al., 2018) |
| miR-140                  | Enhance cerebral protection                                                                                 | (Han et al., 2018; Truettner et al., 2013)                                                                          |
| miR-146                  | 5p isomer inhibits inflammation via NFκB<br>3p isomir increases pro-inflammatory IL-8                       | (Li et al., 2017; Nallamshetty et al., 2013)<br>(Gysler et al., 2016)                                               |
| miR-150                  | Inhibit cell proliferation and migration during stress via HIF and regulates inflammation                   | (Truettner et al., 2013)                                                                                            |
| miR-210                  | Anti-inflammatory via targeting NFκB                                                                        | (Li et al., 2017)                                                                                                   |
| <b>Circadian Rhythms</b> |                                                                                                             |                                                                                                                     |
| miR-325                  | Circadian rhythm – melatonin synthesis                                                                      | (Yang et al., 2017)                                                                                                 |
| <b>Angiogenesis</b>      |                                                                                                             |                                                                                                                     |
| miR-let-7f               | Inhibits angiogenesis through Raf-ERK                                                                       | (Yao et al., 2017)                                                                                                  |
| miR-126                  | Inhibits angiogenesis<br>Involved in vascular integrity and cell function                                   | (Mishra et al., 2009)                                                                                               |
| miR-199                  | Inhibits angiogenesis through HIF-1/VEGF                                                                    | (Dai et al., 2015)                                                                                                  |

## References

- Bavelloni, A., Ramazzotti, G., Poli, A., Piazzzi, M., Focaccia, E., Blalock, W. and Faenza, I.** (2017). MiRNA-210: a current overview. *Anticancer Res* **37**, 6511–6521.
- Chen, Q., Xu, J., Li, L., Li, H., Mao, S., Zhang, F., Zen, K., Zhang, C. Y. and Zhang, Q.** (2014). MicroRNA-23a/b and microRNA-27a/b suppress Apaf-1 protein and alleviate hypoxia-induced neuronal apoptosis. *Cell Death Dis.* **5**, 1–12.
- Dai, L., Lou, W., Zhu, J., Zhou, X. and Di, W.** (2015). MiR-199a inhibits the angiogenic potential of endometrial stromal cells under hypoxia by targeting HIF-1 $\alpha$ /VEGF pathway. *Int J Clin Exp Pathol* **8**, 4735–4744.
- Fang, J., Song, X.-W., Tian, J., Chen, H.-Y., Li, D.-F., Wang, J.-F., Ren, A.-J., Yuan, W.-J. and Lin, L.** (2012). Overexpression of microRNA-378 attenuates ischemia-induced apoptosis by inhibiting caspase-3 expression in cardiac myocytes. *Apoptosis* **17**, 410–423.
- Gu, H., Liu, M., Ding, C., Wang, X., Wang, R., Wu, X. and Fan, R.** (2016). Hypoxia-responsive miR-124 and miR-144 reduce hypoxia-induced autophagy and enhance radiosensitivity of prostate cancer cells via suppressing PIM1. *Cancer Med.* **5**, 1174–1182.
- Gysler, S. M., Mulla, M. J., Guerra, M., Brosens, J. J., Salmon, J. E., Chamley, L. W. and Abrahams, V. M.** (2016). Antiphospholipid antibody-induced miR-146a-3p drives trophoblast interleukin-8 secretion through activation of Toll-like receptor 8. *Mol. Hum. Reprod.* **22**, 465–474.
- Han, L., Dong, Z., Liu, N., Xie, F. and Wang, N.** (2017). Maternally expressed gene 3 (MEG3) enhances PC12 cell hypoxia injury by targeting miR-147. *Cell. Physiol. Biochem.* **43**, 2457–2469.
- Han, X.-R., Wen, X., Wang, Y.-J., Wang, S., Shen, M., Zhang, Z.-F., Fan, S.-H., Shan, Q., Wang, L., Li, M.-Q., et al.** (2018). MicroRNA-140-5p elevates cerebral protection of dexmedetomidine against hypoxic-ischaemic brain damage via the Wnt/ $\beta$ -catenin signalling pathway. *J. Cell. Mol. Med.* **22**, 3167–3182.
- Haque, M., Kendal, J. K., MacIsaac, R. M. and Demetrick, D. J.** (2016). WSB1: from homeostasis to hypoxia. *J. Biomed. Sci.* **23**, 61.
- He, Y., Ge, Y., Jiang, M., Zhou, J., Luo, D., Fan, H., Shi, L., Lin, L. and Yang, L.** (2018). MiR-592 promotes gastric cancer proliferation, migration, and invasion through the PI3K/AKT and MAPK/ERK signaling pathways by targeting Spry2. *Cell. Physiol. Biochem.* **47**, 1465–1481.
- Huang, S., Ge, X., Yu, J., Han, Z., Yin, Z., Li, Y., Chen, F., Wang, H., Zhang, J. and Lei, P.** (2018). Increased miR-124-3p in microglial exosomes following traumatic brain injury inhibits neuronal inflammation and contributes to neurite outgrowth via their transfer into neurons. *FASEB J.* **32**, 512–528.
- Irmady, K., Jackman, K. A., Padow, V. A., Shahani, N., Martin, L. A., Cerchietti, L., Unsicker, K., Iadecola, C. and Hempstead, B. L.** (2014). MiR-592 regulates the induction and cell death-promoting activity of p75NTR in neuronal ischemic injury. *J. Neurosci.* **34**, 3419–3428.

- Jia, Y.-Y., Zhao, J.-Y., Li, B.-L., Gao, K., Song, Y., Liu, M.-Y., Yang, X.-J., Xue, Y., Wen, A.-D. and Shi, L.** (2016). miR-592/WSB1/HIF-1 $\alpha$  axis inhibits glycolytic metabolism to decrease hepatocellular carcinoma growth. *Oncotarget* **7**.
- Li, B., Concepcion, K., Meng, X. and Zhang, L.** (2017). Brain-immune interactions in perinatal hypoxic-ischemic brain injury. *Prog. Neurobiol.* **159**, 50–68.
- Mar-Aguilar, F., Luna-Aguirre, C. M., Moreno-Rocha, J. C., Araiza-Chavez, J., Trevino, V., Rodriguez-Padilla, C. and Resendez-Perez, D.** (2013). Differential expression of miR-21, miR-125b and miR-191 in breast cancer tissue. *Asia. Pac. J. Clin. Oncol.* **9**, 53–59.
- Meng, Z., Kang, H., Duan, W., Zheng, J., Li, Q. and Zhou, Z.** (2018). MicroRNA-210 promotes accumulation of neural precursor cells around ischemic foci after cerebral ischemia by regulating the SOCS1–STAT3–VEGF–C pathway. *J. Am. Heart Assoc.* **7**.
- Mishra, P. K., Tyagi, N., Kumar, M. and Tyagi, S. C.** (2009). MicroRNAs as a therapeutic target for cardiovascular diseases. *J. Cell. Mol. Med.* **13**, 778–789.
- Nallamshetty, S., Chan, S. Y. and Loscalzo, J.** (2013). Hypoxia: A master regulator of microRNA biogenesis and activity. *Free Radic. Biol. Med.* **64**, 20–30.
- Rink, C. and Khanna, S.** (2011). MicroRNA in ischemic stroke etiology and pathology. *Physiol. Genomics* **43**, 521–528.
- Roscigno, G., Puoti, I., Giordano, I., Donnarumma, E., Russo, V., Affinito, A., Adamo, A., Quintavalle, C., Todaro, M., dM Vivanco, M., et al.** (2017). MiR-24 induces chemotherapy resistance and hypoxic advantage in breast cancer. *Oncotarget* **8**, 19507–19521.
- Sabirzhanov, B., Zhao, Z., Stoica, B. A., Loane, D. J., Wu, J., Borroto, C., Dorsey, S. G. and Faden, A. I.** (2014). Downregulation of miR-23a and miR-27a following experimental traumatic brain injury induces neuronal cell death through activation of proapoptotic Bcl-2 proteins. *J. Neurosci.* **34**, 10055–10071.
- Sun, X., Ren, Z., Pan, Y. and Zhang, C.** (2016). Antihypoxic effect of miR-24 in SH-SY5Y cells under hypoxia via downregulating expression of neurocan. *Biochem. Biophys. Res. Commun.* **477**, 692–699.
- Tao, J., Liu, W., Shang, G., Zheng, Y., Huang, J., Lin, R. and Chen, L.** (2015). MiR-207/352 regulate lysosomal-associated membrane proteins and enzymes following ischemic stroke. *Neuroscience* **305**, 1–14.
- Truettner, J. S., Katyshev, V., Esen-Bilgin, N., Dietrich, W. D. and Dore-Duffy, P.** (2013). Hypoxia alters microRNA expression in rat cortical pericytes. *MicroRNA* **2**, 32–45.
- Xiu, L., Xing, Q., Mao, J., Sun, H., Teng, W. and Shan, Z.** (2018). miRNA-125b-5p suppresses hypothyroidism development by targeting signal transducer and activator of transcription 3. *Med. Sci. Monit.* **24**, 5041–5049.
- Yang, Y., Sun, B., Huang, J., Xu, L., Pan, J., Fang, C., Li, M., Li, G., Tao, Y., Yang, X., et al.** (2017). Up-regulation of miR-325-3p suppresses pineal aralkylamine N-acetyltransferase (Aanat) after neonatal hypoxia–ischemia brain injury in rats. *Brain Res.* **1668**, 28–35.

**Yao, Y., Wang, W., Jing, L., Wang, Y., Li, M., Hou, X., Wang, J., Peng, T., Teng, J. and Jia, Y.** (2017). Let-7f regulates the hypoxic response in cerebral ischemia by targeting NDRG3. *Neurochem. Res.* **42**, 446–454.

**Zeng, L., Liu, J., Wang, Y., Wang, L., Weng, S., Tang, Y., Zheng, C., Cheng, Q., Chen, S. and Yang, G. Y.** (2011). MicroRNA-210 as a novel blood biomarker in acute cerebral ischemia. *Front Biosci (Elite Ed)* **3**, 1265–1272.

**Zhang, J., Zhang, J., Zhou, Y., Wu, Y.-J., Ma, L., Wang, R.-J., Huang, S.-Q., Gao, R.-R., Liu, L.-H., Shao, Z.-H., et al.** (2013). Novel cerebellum-enriched miR-592 may play a role in neural progenitor cell differentiation and neuronal maturation through regulating *Lrrc4c* and *Nfasc* in rat. *Curr. Mol. Med.* **13**, 1432–45.

**Zhang, B., Wang, L.-S. and Zhou, Y.-H.** (2017). Elevated microRNA-125b promotes inflammation in rheumatoid arthritis by activation of NF- $\kappa$ B pathway. *Biomed. Pharmacother.* **93**, 1151–1157.

**Zhang, L., Dong, H., Si, Y., Wu, N., Cao, H., Mei, B. and Meng, B.** (2019). miR-125b promotes tau phosphorylation by targeting the neural cell adhesion molecule in neuropathological progression. *Neurobiol. Aging* **73**, 41–49.
